# Supplementary material for: Web-Based Interventions to Improve Mental Health, General Caregiving Outcomes, and General Health for Informal Caregivers of Adults With Chronic Conditions Living in the Community: Rapid Evidence Review
Source: J Med Internet Res. 2017 Jul 28;19(7):e263. doi: 10.2196/jmir.7564 (PMC5554353; doi:10.2196/jmir.7564)
Supplement: Multimedia Appendix 3 [file jmir_v19i7e263_app3.pdf]

### Multimedia Appendix 3. Outcome measures

| Outcome Measured                                  | Outcome Measure or Scale                                   | Used in Study                            |
|---------------------------------------------------|------------------------------------------------------------|------------------------------------------|
| Anxiety                                           | Hospital Anxiety and Depression Scale (HADS)               | [45]                                     |
|                                                   | State-Trait Anxiety Inventory (STAI)                       | [38]                                     |
| Burden                                            | Zarit Burden Interview (ZBI)                               | [12], [46], [48]                         |
| Caregiver Gain                                    | Positive Aspects of Caregiving Survey (PAoCS)              | [38]                                     |
| Caregiver Strain                                  | Caregiver Strain Index (CSI)                               | [36], [38]                               |
| Coping                                            | Brief Cope Scale (BCS)                                     | [31]                                     |
|                                                   | Revised Ways of Coping (R-WoC)                             | [38]                                     |
| Competence or Perspective                         | Short Sense of Competence Questionnaire (SSCQ)             | [37], [47]                               |
| Depression                                        | Beck Depression Inventory (BDI)                            | [46], [48]                               |
| [44], [45]                                        | Center for Epidemiological Studies Depression Scale (CESD) | [36], [38], [39], [12], [34], [41], [42] |
|                                                   | Zung Depression Self Rating Scale (ZDSR)                   | [48]                                     |
|                                                   | Symptom Checklist-90 (SCL-90)                              | [33]                                     |
| Disruptiveness, Burden                            | Caregiver Quality of Life - Cancer Subscale (CQoLC)        | [30]                                     |
| Distress, Empathy, Knowledge, Attitudes           | Interpersonal Reactivity Index (IRI)                       | [47]                                     |
| Knowledge                                         | Alzheimer's Disease Knowledge Scale (ADSK)                 | [47]                                     |
| Knowledge, Self-efficacy, Quality of relationship | Visual Analog Scale (VAS)                                  | [46]                                     |
| Life Satisfaction                                 | Satisfaction with Life Scale (SLS)                         | [40], [41]                               |
| Mastery                                           | Mastery Scale (MS)                                         | [42]                                     |
|                                                   | Personal Mastery Scale (PMS)                               | [12]                                     |
| Negative Mood                                     | Short Version Profile of Mood States (SV-POMS)             | [30]                                     |
| Overall Health                                    | Multidimensional Functional (MFAOA)                        | [43]                                     |
|                                                   | Nottingham Health Profile (NHP)                            | [46]                                     |
| Quality of Life                                   | Caregiver Quality of Life Index (CQoL-I)                   | [36]                                     |
|                                                   | EuroQoL (EQ5D)                                             | [48]                                     |
|                                                   | Perceived Quality of Life (PQoL)                           | [39]                                     |
|                                                   | Quality of Life in Alzheimer's Disease Scale (QoLAD)       | [37]                                     |
|                                                   | Quality of Life Scale (QoLS)                               | [48]                                     |

---

|                                 |                                                            |                  |
|---------------------------------|------------------------------------------------------------|------------------|
| Quality of Life, Overall Health | Health Status Questionnaire (HSQ)                          | [34], [44]       |
| Reaction to Problem Behavior    | Revised Memory and Problem Behavior Checklist (RMPBC)      | [39], [44], [46] |
| Self-Efficacy                   | Revised Scale for Caregiving Self-Efficacy (RSCS)          | [34], [46]       |
| Self-Esteem                     | Self-Esteem Scale (SES)                                    | [42]             |
| Social Support                  | Lubben Social Network Scale                                | [12]             |
|                                 | Assessment of Older Adults (LSNS)                          |                  |
|                                 | Multidimensional Scale of Perceived Social Support (MSPSS) | [34], [44]       |
|                                 | Social Support Survey (SSS)                                | [42]             |
| Stress or Distress              | Neuropsychiatric Inventory (NPI)                           | [48]             |
|                                 | Perceived Stress Scale (PSS)                               | [39], [46]       |
|                                 | Modified Functional Autonomy Measurement System (SMAF)     | [34]             |

---
